# Supplementary material
Source: PubMed Central journal article supplement (PMC7176534)

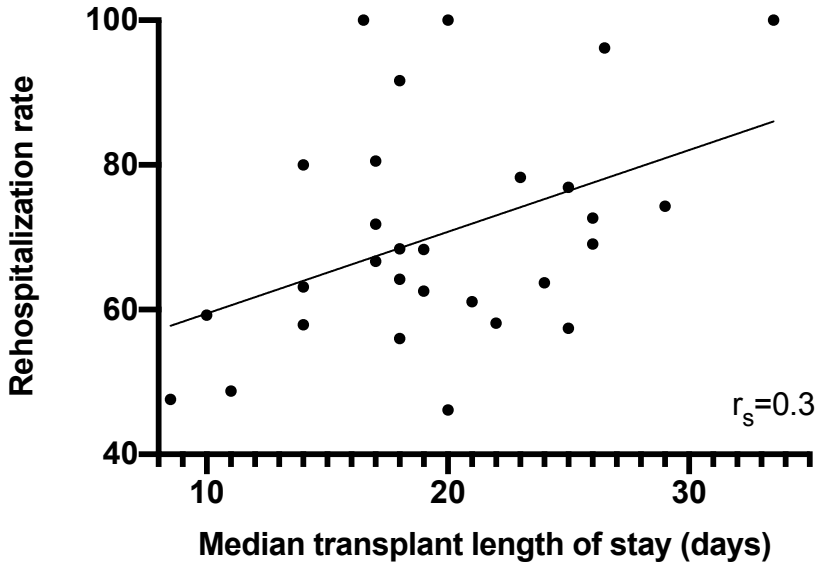

Supplement: NIHMS1570748-supplement-Supplemental_figure_1.pdf [file NIHMS1570748-supplement-Supplemental_figure_1.pdf]
